# Supplementary material for: Studies on the Virome of the Entomopathogenic Fungus Beauveria bassiana Reveal Novel dsRNA Elements and Mild Hypervirulence
Source: PubMed Central journal article supplement (PMC5293280; doi:10.1371/journal.ppat.1006183), 2017-01-23
Supplement: ppat.1006183.s001.pdf [file ppat.1006183.s001.pdf]

**S1 Table.** Arthropod host and geographic origin of *B. bassiana* isolates harboring dsRNA elements.

| <i>B. bassiana</i> isolate | Arthropod Host                 |                      |                       |                   | Location                  |
|----------------------------|--------------------------------|----------------------|-----------------------|-------------------|---------------------------|
|                            | Species/Genus                  | Family               | Superfamily           | Order             |                           |
| IMI 392612                 | Adult spider                   | <i>Araneidae</i>     | <i>Araneoidea</i>     | <i>Arachnida</i>  | Ecuador                   |
| IMI 386705                 | <i>Diabrotica speciosa</i>     | <i>Chrysomelidae</i> | <i>Chrysomeloidea</i> | <i>Coleoptera</i> | Brazil                    |
| IMI 331273 (ARSEF 757)     | Terebrinoid beetle             | <i>Terebrionidae</i> | <i>Terebrionoidea</i> |                   | Brazil                    |
| IMI 391043                 | <i>Eurygaster sp.</i>          |                      | <i>Pentatomoidea</i>  | <i>Hemiptera</i>  | Syria                     |
| IMI 391044                 | <i>Eurygaster integriceps</i>  |                      | <i>Pentatomoidea</i>  |                   | Syria                     |
| IMI 391362                 | <i>Eurygaster integriceps</i>  |                      | <i>Pentatomoidea</i>  |                   | Syria                     |
| IMI 391704                 | <i>Eurygaster integriceps</i>  |                      | <i>Pentatomoidea</i>  |                   | Syria                     |
| SP R 159                   | <i>Eurygaster integriceps</i>  |                      | <i>Pentatomoidea</i>  |                   | Russia                    |
| SP R 184                   | <i>Eurygaster integriceps</i>  |                      | <i>Pentatomoidea</i>  |                   | Russia                    |
| SP U 259                   | <i>Eurygaster integriceps</i>  |                      | <i>Pentatomoidea</i>  |                   | Uzbekistan                |
| EABb 92/11-Dm              | <i>Dociostaurus maroccanus</i> | <i>Acrididae</i>     | <i>Acridoidea</i>     | <i>Orthoptera</i> | Spain "la Serena" Badajoz |
| ATHUM 4946                 | Air-borne                      |                      |                       |                   | Greece, Athens            |
| EABb 01/103Su              | Soil, forest                   |                      |                       |                   | Spain, Seville            |
| EABb 01/12Su               | Soil, non-cultivated area      |                      |                       |                   |                           |
| EABb 01/88Su               | Soil, sunflower                |                      |                       |                   | Portugal (south)          |
| EABb 00/23Su               | Soil, pasture                  |                      |                       |                   | Canary Islands (Tenerife) |
