# Supplementary material for: Studies on the Virome of the Entomopathogenic Fungus Beauveria bassiana Reveal Novel dsRNA Elements and Mild Hypervirulence
Source: PubMed Central journal article supplement (PMC5293280; doi:10.1371/journal.ppat.1006183), 2017-01-23
Supplement: ppat.1006183.s002.pdf [file ppat.1006183.s002.pdf]

**S2 Table.** Taxonomy, acronym and accession number of viruses used for phylogenetic analysis.

| Family                                          | Genus                                  | Virus name                                  | Acronym                                        | Accession number |              | Reference   |             |
|-------------------------------------------------|----------------------------------------|---------------------------------------------|------------------------------------------------|------------------|--------------|-------------|-------------|
|                                                 |                                        |                                             |                                                | RdRP             | CP           |             |             |
| <i>Amalgaviridae</i>                            | <i>Amalgavirus</i>                     | Blueberry latent virus                      | BLV                                            | YP_003934623     |              | 1           |             |
|                                                 |                                        | Rhododendron virus A                        | RV-A                                           | YP_003868436     |              | 2           |             |
|                                                 |                                        | Southern tomato virus                       | STV                                            | YP_002321509     |              | 3           |             |
|                                                 |                                        | Vicia cryptic virus M                       | VCV-M                                          | EU371896         |              | unpublished |             |
| <i>Astroviridae</i>                             | <i>Avastrovirus</i>                    | Avastrovirus 1                              | AAV-1                                          | CAB95006         |              | 4           |             |
|                                                 |                                        | Avastrovirus 3                              | AAV-3                                          | YP_002728002     |              | 5           |             |
|                                                 | <i>Mamastrovirus</i>                   | Mamastrovirus 1                             | MAV-1                                          | NP_059443        |              | 6           |             |
|                                                 |                                        | Mamastrovirus 10                            | MAV-10                                         | AAO32082         |              | 7           |             |
| <i>Caliciviridae</i>                            | <i>Lagovirus</i>                       | Rabbit haemorrhagic disease virus           | RHCV                                           | NP_062875        |              | 8           |             |
|                                                 | <i>Nebovirus</i>                       | Newbury-1 virus                             | NB-1V                                          | NP_663315        |              | 9           |             |
|                                                 | <i>Norovirus</i>                       | Norwalk virus                               | NV                                             | NP_056820        |              | 10          |             |
|                                                 | <i>Sapovirus</i>                       | Sapporo virus                               | SV                                             | NP_051035        |              | 11          |             |
|                                                 | <i>Vesivirus</i>                       | Vesicular exanthema of swine virus          | VESV                                           | NP_786896        |              | 12          |             |
| <i>Partitiviridae</i>                           | <i>Alphapartitivirus</i>               | White clover cryptic virus 1                | WCCC-1                                         | YP_086754        | YP_086755    | 13          |             |
|                                                 | <i>Betapartitivirus</i>                | Atkinsonella hypoxylon partitivirus         | AhPV                                           | NP_604475        | NP_604476    | 14          |             |
|                                                 | <i>Gammapartitivirus</i>               | Aspergillus fumigatus partitivirus-1        | AfuPV-1                                        | CAY25801         | CAZ61323     | 15          |             |
|                                                 |                                        | Aspergillus ochraceous virus                | AoV                                            | ABV30675         | ABV30676     | 16          |             |
|                                                 |                                        | Beauveria bassiana partitivirus-1           | BbPV-1                                         | LN896303         | LN896304     |             |             |
|                                                 |                                        | Beauveria bassiana partitivirus-2           | BbPV-2                                         | LN896305         | LN896306     |             |             |
|                                                 |                                        | Botryotinia fuckeliana partitivirus 1       | BfPV-1                                         | CAM33266         | CAM33267     | unpublished |             |
|                                                 |                                        | Discula destructiva virus 1                 | DdV-1                                          | AAG59816         | AAK13165     | 17          |             |
|                                                 |                                        | Discula destructiva virus 2                 | DdV-2                                          | AAK59379         | AAK59380     | 17          |             |
|                                                 |                                        | Fusarium solani virus 1                     | FsV-1                                          | BAA09520         | BAA09521     | 18          |             |
|                                                 |                                        | Gremmeniella abietina RNA virus MS1         | GaV-MS1                                        | AAM12240         | AAM12241     | 19          |             |
|                                                 |                                        | Ophiostoma partitivirus 1                   | OPV-1                                          | CAJ31886         | CAJ31887     | 20          |             |
|                                                 |                                        | Penicillium stoloniferum virus F            | PsV-F                                          | AAU95758         | AAU95759     | 21          |             |
|                                                 |                                        | Penicillium stoloniferum virus S            | PsV-S                                          | YP_052856        | YP_052857    | 22          |             |
|                                                 |                                        | Ustilagoidea virens partitivirus            | UvPV                                           | AGO04402         | AGO04403     | 23          |             |
|                                                 |                                        | Verticillium dahliae partitivirus 1         | VdPV-1                                         | AGI52210         | AGI52209     | 24          |             |
|                                                 |                                        | <i>Deltapartitivirus</i>                    | Beet cryptic virus 2                           | BCV-1            | ADP24757     |             | unpublished |
|                                                 |                                        |                                             | Beet cryptic virus 3                           | BCV-3            | AAB27624     |             | 25          |
|                                                 |                                        |                                             | Fig cryptic virus                              | FCV              | YP_004429258 |             | 26          |
|                                                 |                                        |                                             | Pepper cryptic virus 1                         | PCV-1            | AEJ07890     | AEJ07891    | 27          |
| <i>Narnaviridae</i>                             | <i>Mitovirus</i>                       | Ophiostoma mitovirus 4                      | OMV-4                                          | NP_660179        |              | 28          |             |
|                                                 |                                        | <i>Narnavirus</i>                           | Beauveria bassiana small Narna-like virus      | BbSNLV           | LT627647     |             |             |
|                                                 |                                        | Leptomonas seymouri Narna-like virus 1      | LsNLV-1                                        | ANI86034         |              | unpublished |             |
|                                                 |                                        | Phytomonas serpens narnavirus 1             | PsNV-1                                         | YP_009256557     |              | 29          |             |
|                                                 |                                        | Phytophthora infestans RNA virus 4          | PIRV-4                                         | AEM89293         |              | 30          |             |
|                                                 |                                        | Saccharomyces cerevisiae 20S RNA narnavirus | ScNV-20S                                       | NP_660178        |              | 31          |             |
|                                                 |                                        | Saccharomyces cerevisiae 23S RNA narnavirus | ScNV-23S                                       | NP_660177        |              | 31          |             |
|                                                 | <i>Unirnaviridae</i> *                 | <i>Unirnavirus</i>                          | Alternaria longipes dsRNA virus 1              | AIRV-1           | AIJ01443     |             | 32          |
|                                                 |                                        |                                             | Beauveria bassiana non-segmented virus 1       | BbNV-1           | LN610699     |             | 33          |
|                                                 |                                        |                                             | Beauveria bassiana RNA virus 1                 | BbRV-1           | AKC57301     |             | 34          |
| Ustilagoidea virens unassigned RNA virus HNND-1 |                                        |                                             | UvRV-HNND-1                                    | YP_009154709     |              | 35          |             |
| unassigned                                      |                                        |                                             | Cryphonectria parasitica bipartite mycovirus 1 | CpV-1            | YP_007985675 |             | unpublished |
|                                                 | Fusarium graminearum dsRNA mycovirus-4 | FgV-4                                       | YP_003288790                                   |                  | 36           |             |             |
|                                                 | Gremmeniella abietina RNA virus 6      | GaRV-6                                      | AIU98624                                       |                  | unpublished  |             |             |
|                                                 | Heterobasidion RNA virus 6             | HRV-6                                       | AHA82547                                       |                  | 37           |             |             |
|                                                 | Rhizoctonia fumigata mycovirus         | RfuV                                        | YP_009134757                                   |                  | unpublished  |             |             |
|                                                 | Rhizoctonia solani dsRNA virus 1       | RsRV-1                                      | AFZ85210                                       |                  | 38           |             |             |

\*proposed family

1. Martin RR, Zhou J and Tzanetakis IE (2011) Blueberry latent virus: An amalgam of the *Partitiviridae* and *Totiviridae*. *Virus Res* 155(1):175-180.
2. Sabanadzovic S, Abou Ghanem-Sabanadzovic N and Valverde RA (2010) A novel monopartite dsRNA virus from rhododendron. *Arch Virol* 155(11):1859-1863.
3. Sabanadzovic S, Valverde RA, Brown JK, Martin RR and Tzanetakis IE (2009) Southern tomato virus: The link between the families *Totiviridae* and *Partitiviridae*. *Virus Res* 140(1-2):130-137.
4. Jonassen CM, Jonassen TO, Sveen TM and Grinde B (2003) Complete genomic sequences of astroviruses from sheep and turkey: comparison with related viruses. *Virus Res* 91(2):195-201.
5. Fu Y, Pan M, Wang X, Xu Y, Xie X, Knowles NJ, Yang H and Zhang D (2009) Complete sequence of a duck astrovirus associated with fatal hepatitis in ducklings. *J Gen Virol* 90(Pt 5): 1104-1108.
6. Willcocks MM, Brown TD, Madeley CR and Carter MJ (1994) The complete sequence of a human astrovirus. *J Gen Virol* 75(Pt 7):1785-1788.
7. Mittelholzer C, Hedlund KO, Englund L, Dietz HH and Svensson L (2003) Molecular characterization of a novel astrovirus associated with disease in mink. *J Gen Virol* 84(Pt 11):3087-3094.
8. Meyers G, Wirblich C and Thiel HJ (1991) Rabbit hemorrhagic disease virus--molecular cloning and nucleotide sequencing of a calicivirus genome. *Virology* 184(2):664-676.
9. Smiley JR, Chang KO, Hayes J, Vinje J and Saif LJ (2002) Characterization of an enteropathogenic bovine calicivirus representing a potentially new calicivirus genus. *J Virol* 76(20):10089-10098.
10. Liu B, Clarke IN and Lambden PR (1996) Polyprotein processing in Southampton virus: identification of 3C-like protease cleavage sites by *in vitro* mutagenesis. *J Virol* 70(4):2605-2610.
11. Guo M, Chang KO, Hardy ME, Zhang Q, Parwani AV and Saif LJ (1999) Molecular characterization of a porcine enteric calicivirus genetically related to Sapporo-like human caliciviruses. *J Virol* 73(11):9625-9631.
12. Neill JD, Meyer RF and Seal BS (1998) The capsid protein of vesicular exanthema of swine virus serotype A48: relationship to the capsid protein of other animal caliciviruses. *Virus Res* 54(1):39-50.
13. Boccardo G and Candresse T (2005) Complete sequence of the RNA1 of an isolate of White clover cryptic virus 1, type species of the genus *Alphacryptovirus*. *Arch Virol* 150(2):399-402.
14. Oh CS and Hillman BI (1995) Genome organization of a partitivirus from the filamentous ascomycete *Atkinsonella hypoxylon*. *J Gen Virol* 76(Pt 6): 1461-1470.
15. Bhatti MF, Bignell EM and Coutts RHA (2011) Complete nucleotide sequences of two dsRNAs associated with a new partitivirus infecting *Aspergillus fumigatus*. *Arch Virol* 156(9):1677-1680.
16. Liu W, Duns G and Chen J (2008) Genomic characterization of a novel partitivirus infecting *Aspergillus ochraceus*. *Virus Genes* 37(3):322-327.
17. Rong R, Rao S, Scott SW, Carner GR and Tainter FH (2002) Complete sequence of the genome of two dsRNA viruses from *Discula destructiva*. *Virus Res* 90(1-2):217-224.
18. Nogawa M, Kageyama T, Nakatani A, Taguchi G, Shimosaka M and Okazaki M (1996) Cloning and characterization of mycovirus double-stranded RNA from the plant pathogenic fungus, *Fusarium solani* f. sp. *Robiniae*. *Biosci Biotechnol Biochem* 60(5):784-788.
19. Tuomivirta TT and Hantula J (2003) Two unrelated double-stranded RNA molecule patterns in *Gremmeniella abietina* type A code for putative viruses of the families *Totiviridae* and *Partitiviridae*. *Arch Virol* 148(12):2293-2305.
20. Crawford LJ, Osman TA, Booy FP, Coutts RHA, Brasier CM and Buck KW (2006) Molecular characterization of a partitivirus from *Ophiostoma himal-ulmi*. *Virus Genes* 33(1):33-39.
21. Kim JW, Choi EY and Lee JI (2005) Genome organization and expression of the *Penicillium stoloniferum* virus F. *Virus Genes* 31(2):175-183.
22. Kim JW, Kim SY and Kim KM (2003) Genome organization and expression of the *Penicillium stoloniferum* virus S. *Virus Genes* 27(3):249-256.
23. Zhang T, Jiang Y, Huang J and Dong W (2013) Genomic organization of a novel partitivirus from the phytopathogenic fungus *Ustilaginoidea virens*. *Arch Virol* 158(11):2415-2419.

24. Feng Z, Zhu H, Li Z, Shi Y, Zhao L, Liu L and Jiang D (2013) Complete genome sequence of a novel dsRNA mycovirus isolated from the phytopathogenic fungus *Verticillium dahliae* Kleb. *Arch Virol* 158(12):2621-2623.
25. Xie WS, Antoniw JF and White RF (1993) Nucleotide sequence of beet cryptic virus 3 dsRNA2 which encodes a putative RNA-dependent RNA polymerase. *J Gen Virol* 74(Pt 7):1467-1470.
26. Elbeaino T, Kubaa RA, Digiario M, Minafra A and Martelli GP (2011) The complete nucleotide sequence and genome organization of Fig cryptic virus, a novel bipartite dsRNA virus infecting fig, widely distributed in the Mediterranean basin. *Virus Genes* 42(3):415-421.
27. Sabanadzovic S and Valverde RA (2011) Properties and detection of two cryptoviruses from pepper (*Capsicum annuum*). *Virus Genes* 43(2):307-312.
28. Hong Y, Dover SL, Cole TE, Brasier CM and Buck KW (1999) Multiple mitochondrial viruses in an isolate of the Dutch Elm disease fungus *Ophiostoma novo-ulmi*. *Virology* 258(1):118-127.
29. Akopyants NS, Lye L-F, Dobson DE, Lukes J and Beverley SM (2016) A narnavirus in the trypanosomatid protist plant pathogen *Phytomonas serpens*. *Genome Announc* 4(4):e00711-16.
30. Cai G, Myers K, Fry WE and Hillman BI (2012) A member of the virus family *Narnaviridae* from the plant pathogenic oomycete *Phytophthora infestans*. *Arch Virol* 157(1):165-169.
31. Rodriguez-Cousino N, Solorzano A, Fujimura T and Esteban R (1998) Yeast positive-stranded virus-like RNA replicons. 20 S and 23 S RNA terminal nucleotide sequences and 3' end secondary structures resemble those of RNA coliphages. *J Biol Chem* 273(32), 20363-20371.
32. Lin Y, Zhang H, Zhao C, Liu S and Guo L (2015) The complete genome sequence of a novel mycovirus from *Alternaria longipes* strain HN28. *Arch Virol* 160(2):577-580.
33. Kotta-Loizou I, Sipkova J and Coutts RHA (2015) Identification and sequence determination of a novel double-stranded RNA mycovirus from the entomopathogenic fungus *Beauveria bassiana*. *Arch Virol* 160(3):873-875.
34. Koloniuk I, Hrabakova L and Petrzik K (2015) Molecular characterization of a novel amalgavirus from the entomopathogenic fungus *Beauveria bassiana*. *Arch Virol* 160(6):1585-1588.
35. Zhu HJ, Chen D, Zhong J, Zhang SY and Gao BD (2015) A novel mycovirus identified from the rice false smut fungus *Ustilaginoidea virens*. *Virus Genes* 51(1):159-162.
36. Yu J, Kwon SJ, Lee KM, Son M and Kim KH (2009) Complete nucleotide sequence of double-stranded RNA viruses from *Fusarium graminearum* strain DK3. *Arch Virol* 154(11):1855-1858.
37. Vainio EJ, Muller MM, Korhonen K, Piri T and Hantula J (2015) Viruses accumulate in aging infection centers of a fungal forest pathogen. *ISME J* 9(2):497-507.
38. Zheng L, Liu H, Zhang M, Cao X and Zhou E (2013) The complete genomic sequence of a novel mycovirus from *Rhizoctonia solani* AG-1 IA strain B275. *Arch Virol* 158 (7):1609-1612.
