# Supplementary material for: Studies on the Virome of the Entomopathogenic Fungus Beauveria bassiana Reveal Novel dsRNA Elements and Mild Hypervirulence
Source: PubMed Central journal article supplement (PMC5293280; doi:10.1371/journal.ppat.1006183), 2017-01-23
Supplement: ppat.1006183.s003.pdf [file ppat.1006183.s003.pdf]

**S3 Table.** Properties of known polymycoviruses.

| Virus name                                   | Abbreviation | Segment (bp)     | Accession number | ORF size (nt; aa; kDa) | UTR length (bp) |        |
|----------------------------------------------|--------------|------------------|------------------|------------------------|-----------------|--------|
|                                              |              |                  |                  |                        | 5'-UTR          | 3'-UTR |
| Aspergillus fumigatus polymycovirus-1        | AfuPmV-1     | dsRNA 1 (2,403)  | HG975302         | 2,292; 763; 84         | 35              | 76     |
|                                              |              | dsRNA 2 (2,233)  | HG975303         | 2,091; 696; 76         | 70              | 72     |
|                                              |              | dsRNA 3 (1,970)  | HG975304         | 1,845; 614; 67         | 51              | 74     |
|                                              |              | dsRNA 4 (1,131)  | HG975305         | 840; 279; 29           | 86              | 205    |
| Beauveria bassiana polymycovirus-1           | BbPmV-1      | dsRNA 1 (2,425)  | LN896307         | 2,328; 775; 86         | 26              | 71     |
|                                              |              | dsRNA 2 (2,260)  | LN896308         | 2,115; 704; 75         | 71              | 74     |
|                                              |              | dsRNA 3 (1,921)  | LN896309         | 1,833; 610; 67         | 31              | 57     |
|                                              |              | dsRNA 4 (1,373)  | LN896310         | 921; 306; 32           | 72              | 380    |
| Botryosphaeria dothidea polymycovirus-1 [1]  | BdPmV-1      | dsRNA 1 (2,379)  | KP245734         | 2,274; 757; 82         | 53              | 70     |
|                                              |              | dsRNA 2 (2,184)  | KP245735         | 2,085; 694; 75         | 70              | 29     |
|                                              |              | dsRNA 3 (1,967)  | KP245736         | 1,719; 572; 62         | 57              | 191    |
|                                              |              | dsRNA 4 (1,131)  | KP245737         | 828; 275; 29           | 89              | 214    |
|                                              |              | dsRNA 5 (1,060)  | KP245738         | 840; 279; 30           | 98              | 122    |
| Cladosporium cladosporioides polymycovirus-1 | CcPmV-1      | dsRNA 1 (2,434)  | NC_024704        | 2,283; 760; 83         | 43              | 108    |
|                                              |              | dsRNA 2 (2,241)  | NC_024705        | 2,046; 681; 73         | 72              | 123    |
|                                              |              | dsRNA 3 (2,008)  | NC_024706        | 1,860; 619; 67         | 57              | 91     |
|                                              |              | dsRNA 4 (1,261)  | NC_024707        | 885; 294; 31           | 185             | 191    |
|                                              |              | dsRNA 5 (942)    | NC_024708        | 720; 239; 26           | 90              | 132    |
| Alternaria polymycovirus-1                   | AltPmV-1     | dsRNA 2 (2,233)  | FJ595830         | 2,091; 686; 75         | 71              | 71     |
|                                              |              | dsRNA 5 (1,365)  | FJ595831         | 1,170; 389; 42         | 97              | 98     |
|                                              |              | dsRNA 6 (1,033)  | FJ595832         | 543; 176; 19           | 119             | 371    |
| Beauveria bassiana polymycovirus-2           | BbPmV-2      | dsRNA 1 (2,405)  | LN896311         | 2,304; 767; 83         | 26              | 75     |
|                                              |              | dsRNA 6 (1,009)  | LN896312         | 750; 249; 27           | 100             | 159    |
|                                              |              | dsRNA 7 (868)    | LN896313         | 618; 205; 22           | 104             | 146    |
| Melampsora lini polymycovirus-1 [2]          | MlPmV-1      | dsRNA 3 (1,932)  | X64371           | 1,845; 614; 67         | 29              | 58     |
| Alternaria tenuissima polymycovirus-1        | AtPmV-1      | dsRNA 1 (1,613)* | KP067914         |                        |                 |        |
| Beauveria bassiana polymycovirus-3           | BbPmV-3      | dsRNA 1 (165)*   | LN896318         |                        |                 |        |
|                                              |              | dsRNA 2 (443)*   | LN896319         |                        |                 |        |
|                                              |              | dsRNA 3 (259)*   | LN896320         |                        |                 |        |
| Melampsora lini polymycovirus-1              | MlPmV-1      | dsRNA 2 (1,768)* |                  |                        |                 |        |

\*partial sequence

- Zhai L, Xiang J, Zhang M, Fu M, Yang Z, Hong N, Wang G (2016) Characterization of a novel double-stranded RNA mycovirus conferring hypovirulence from the phytopathogenic fungus *Botryosphaeria dothidea*. *Virology* 493:75-85.
- Dickinson MJ, Zhang R and Pryor A (1993) Nucleotide sequence relationships of double-stranded RNAs in flax rust, *Melampsora lini*. *Curr Genet* 24(5):428-432.
