# Supplementary material for: Studies on the Virome of the Entomopathogenic Fungus Beauveria bassiana Reveal Novel dsRNA Elements and Mild Hypervirulence
Source: PubMed Central journal article supplement (PMC5293280; doi:10.1371/journal.ppat.1006183), 2017-01-23
Supplement: ppat.1006183.s004.pdf [file ppat.1006183.s004.pdf]

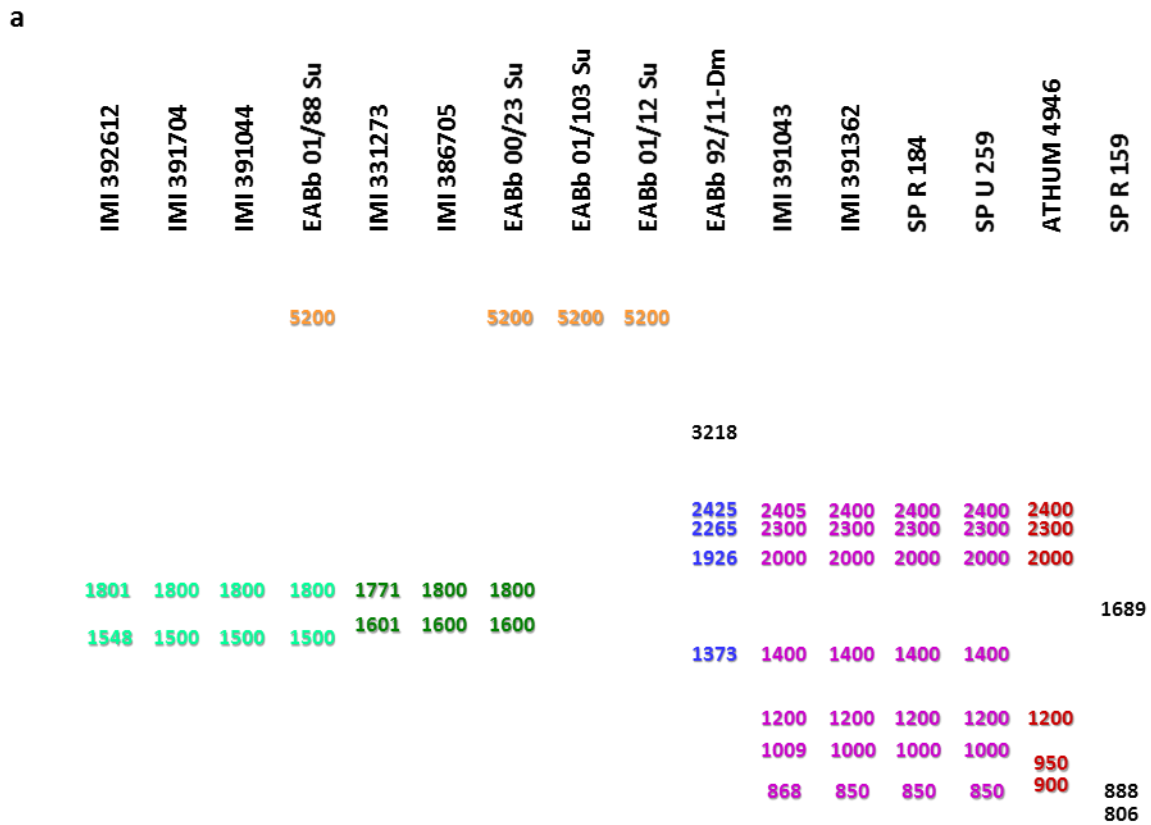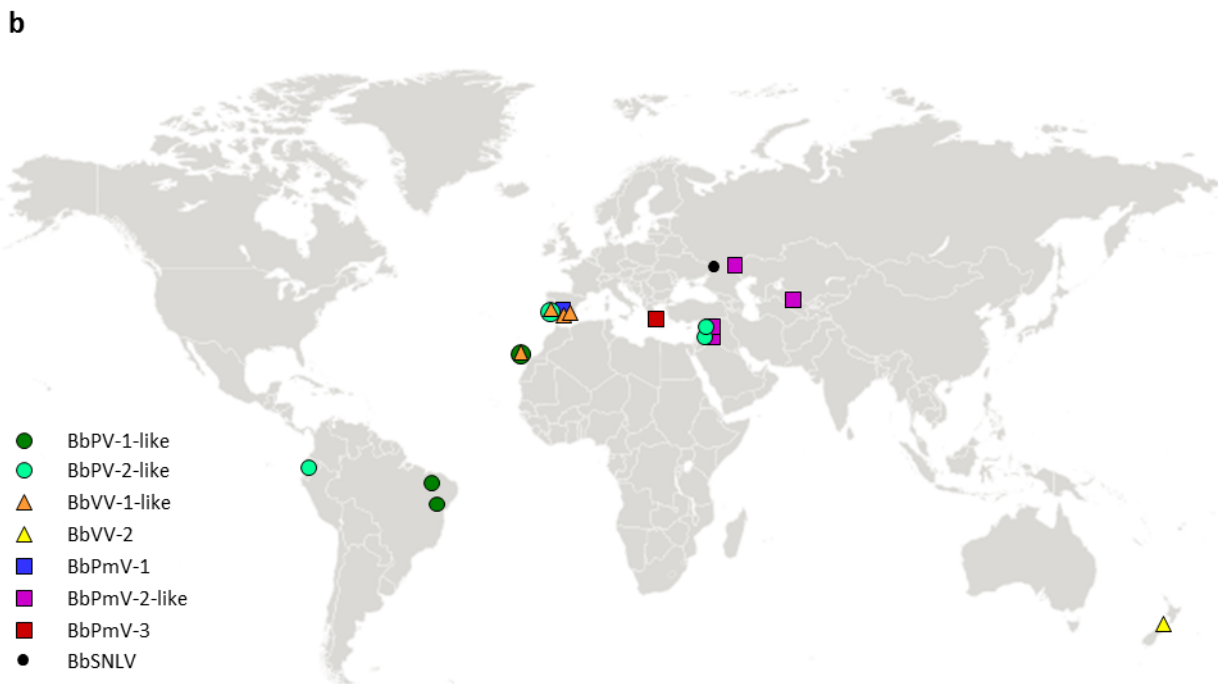

**S1 Fig. Population study of dsRNA elements in *Beauveria bassiana*.** (a) Schematic representation of the electrophoretic profiles of dsRNA elements extracted from 17 *B. bassiana* isolates and their relative sizes. (b) Geographical distribution of mycoviruses found in *B. bassiana*.
