# Supplementary material for: Studies on the Virome of the Entomopathogenic Fungus Beauveria bassiana Reveal Novel dsRNA Elements and Mild Hypervirulence
Source: PubMed Central journal article supplement (PMC5293280; doi:10.1371/journal.ppat.1006183), 2017-01-23
Supplement: ppat.1006183.s007.pdf [file ppat.1006183.s007.pdf]

**a** *Botryosphaeria dothidea* polmycovirus-1 (BdPmV-1)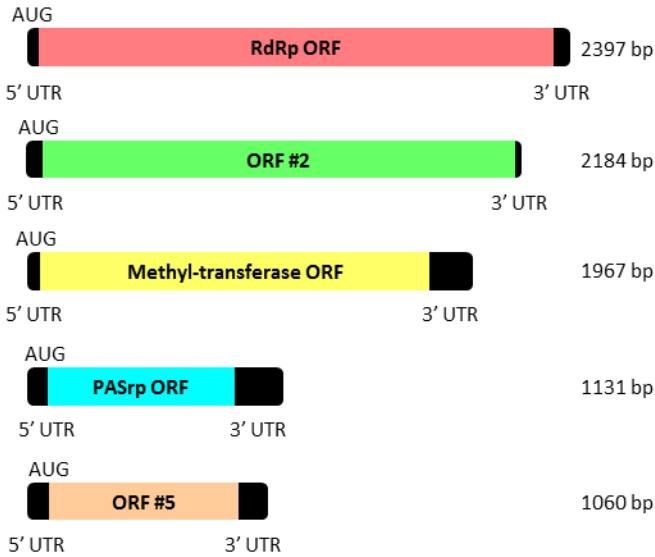**b** *Cladosporium cladosporioides* polmycovirus-1 (CcPmV-1)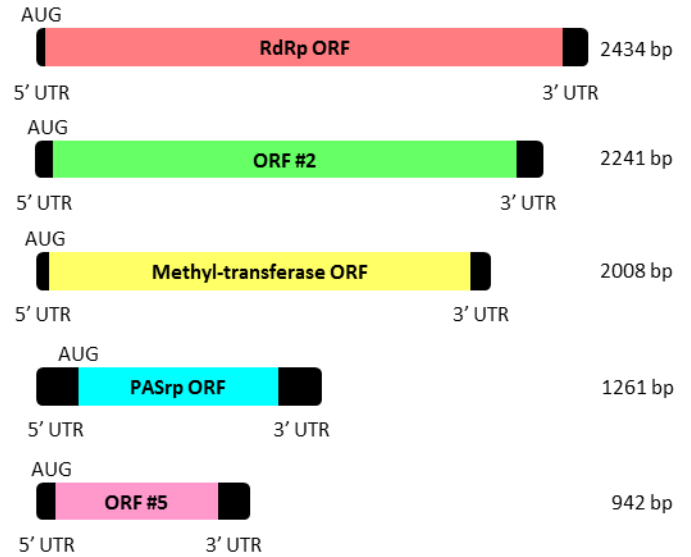**c** BdPmV-1 5' UTR termini

dsRNA 1 (1-53 bp)  
dsRNA 2 (1-66 bp)  
dsRNA 3 (1-57 bp)  
dsRNA 4 (1-77 bp)  
dsRNA 5 (1-77 bp)

CGATTAAGCTTTAGTTTATTCGCTTGTTCCTACGTCGCGAGGTTATCTAAGC-----  
CGATTAAGCTTTAGTTTATTCGCTTGTTCGCGACGTCGCGAGGTTCTCTGAAGCGTAGAACGTT-----  
CGATTAAGCTTTAGTTTATTCGCTTGTTCGCGACGTCGCGAGGTTCTCTGAAGCGTAGAACGTT-----  
CGATTAAGCTTTAATAATTCGCTTGTTCGCGACGTCGCGAGGTTCTCTGAAGCGTAGAACGTT-----  
CGATTAAGCTTTAATAATTCGCTTGTTCGCGACGTCGCGAGGTTCTCTGAAGCGTAGAACGTT-----  
\*\*\*\*\*.\* \* \* \* .\*\*\*\*\*.\* \* .\*\*\*\*\*. . . . .

BdPmV-1 3' UTR termini  
dsRNA 1 (2419-2434 bp)  
dsRNA 2 (2226-2241 bp)  
dsRNA 3 (1996-2008 bp)  
dsRNA 4 (1251-1261 bp)  
dsRNA 5 (930-942 bp)

CCCCCGCCCCGGATGGGGT  
CCCTCGCGGTGGGGTGGGGT  
CCCCCGCGGGGGGGTGGGGT  
CCTCGGGGGGGATGGGGT  
CCCCCGCGGGCGCATGGGGT  
\* \* . . . . .

**d** CcPmV-1 5' UTR termini

dsRNA 1 (1-43 bp)  
dsRNA 2 (1-68 bp)  
dsRNA 3 (1-57 bp)  
dsRNA 4 (1-77 bp)  
dsRNA 5 (1-76 bp)

CGTAAATAAACCTTAAACCGCTACAAGTATTATCAGATACGAGC-----  
CGTAAATAAACCTTAAACCGTACAAGTATAATCAGTATTGAGGTTCCCAACCTCATGCGTTCGCGAAG-----  
CGTAAATAAACCTTAAACCGTACAAGTATAATCAGTATCAGATACGAGAAAGCAGCTCGAGC-----  
CGTAAATAAACCTTAAACCGTACAAGTATCCAGAGTCCAGAAAGTGAATCTGCGTAACTGCGAACTCCGTTTC  
-GTAATAAACCTTAAACCGCAGCAAGTATACCACAAGGTGTAATAAGACACTCCCGTCTTTTACCCTTGTGCTTTCC  
\*\*\*\*\*.\* \* \* \* .\*\*\*\*\*.\* \* .\*\*\*\*\*. . . . .

CcPmV-1 3' UTR termini  
dsRNA 1 (2421-2434 bp)  
dsRNA 2 (2228-2241 bp)  
dsRNA 3 (1995-2008 bp)  
dsRNA 4 (1247-1261 bp)  
dsRNA 5 (929-942 bp)

TGGGGGGGGGGGG-  
TGGGGGAGGGGGGG-  
CCGTGGGGGGGGGG-  
CCGCCGCGGGGGGG-  
CCGTGACGGGGGGG-  
. \* . . . . .

**e** AltPmV-1 5' UTR termini

dsRNA 2 (1-71 bp)  
dsRNA 5 (1-72 bp)  
dsRNA 6 (1-72 bp)

CGAACAAACCAGTCTTCTGTACTTCGTAGCTACTTCGTCTGGTTCCGGTCCAACAAACCCCTTGAGTG-  
TGAAACAAACCAGTCTTCTGTACTTCGTAGGCTTATCGTCCTGTTCCGTAGGCACAGACCTTGTAAACACGA  
TGAAACAAACATAACTTCCGTACAAGTACACTACGTCGTTTGTTCGCCGAGAAACAAAGAGTCAAGAAAGGA  
.\*\*\*\*\*.\* \* \* \* .\*\*\*\*\*.\* \* .\*\*\*\*\*. . . . .

AltPmV-1 3' UTR termini  
dsRNA 2 (2206-2233 bp)  
dsRNA 5 (1338-1365 bp)  
dsRNA 6 (860-887 bp)

GTTCCGGGCCCCAGACGGGGTGGAGTTT  
GCCCGCTCCCCAGACGGGGTGGAGTTT  
CTTCTGTTTTCGGCGAGGGGGGGTTT  
\* \* . . . . .

**f** BbPmV-1 5' UTR termini

dsRNA 1 (1-26 bp)  
dsRNA 2 (1-71 bp)  
dsRNA 3 (1-31 bp)  
dsRNA 4 (1-72 bp)

CGAATATATATTTTAAATTCGG-CAA-C-----  
CGAATATATATTTTAAATTTT-GTCAAGCCATCAGTACTGTGGCCACTCCCATAGGCCGCTTGTAGATTGGA  
CGAATATATATTTTAAATTTTCG-CAAGCCATC-----  
CGAATATATATTTCAAACCTTGTCTTGCCATCGGTAAGGGAGCTACACCAATAGCCCCAACCGTGTTCGAG  
\*\*\*\*\*.\* \* \* \* .\*\*\*\*\*.\* \* .\*\*\*\*\*. . . . .

BbPmV-1 3' UTR termini  
dsRNA 1 (2414-2425 bp)  
dsRNA 2 (2251-2260 bp)  
dsRNA 3 (1909-1921 bp)  
dsRNA 4 (1364-1373 bp)

CATAGTTTTTTT-  
CGTAGTTTTTT-  
CATAGTTTTTTG  
CGTAGTTTTTG-  
\* \* . . . . .

**g** BbPmV-2 5' UTR termini

dsRNA 1 (1-26 bp)  
dsRNA 6 (1-26 bp)  
dsRNA 7 (1-26 bp)

CGAACTAAAGAGTTTTTCTACACAAG  
CGAACTAAAGGCTTTCTTTTACACAAG  
CGAACTAAAGAGTTTTTCTACGCAAG  
\*\*\*\*\*.\* \* \* \* .\*\*\*\*\*.\* \* .\*\*\*\*\*. . . . .

BbPmV-2 3' UTR termini  
dsRNA 1 (2397-2405 bp)  
dsRNA 6 (1001-1009 bp)  
dsRNA 7 (678-686 bp)

GGAATTTTT  
GTGAATTTTT  
GAATTTTTT  
\* \* . . . . .

**S4 Fig. Sequence properties of known polmycoviruses.** Schematic representation of the genomic organisation of **(a)** BdPmV-1 and **(b)** CcPmV-1. Each genome consist of five dsRNAs, each containing one ORF (grey boxes) flanked by 5'- and 3'-UTRs (black boxes). A comparative alignment of the 5'- and 3'-terminal sequences of **(c)** BdPmV-1 dsRNAs 1–5, **(d)** CcPmV-1 dsRNAs 1–5, **(e)** AltPmV-1 dsRNAs 2, 5 and 6, **(f)** BbPmV-1 dsRNAs 1–4 and **(g)** BbPmV-1 dsRNAs 1, 6 and 7. Asterisks signify identical nucleotides. AltPmV-1 dsRNA 6 does not share a similar 3'-terminal sequence with dsRNAs 2 or 5; however there is an internal sequence in its 3'-UTR with significant similarity to the 3'-terminus of dsRNAs 2 and 5, indicating a possible sequencing error. Virus names, acronyms, and GenBank accession numbers are listed in S3 Table.
